# Supplementary material
Source: Royal Society of Chemistry journal article supplement (doi:10.1039/d6nj00762g)
Supplement: d6nj00762g1.pdf [file d6nj00762g1.pdf]

# Superior Energy Storage Performance of MOF/PANI Nanocomposites: Toward Sustainable Supercapacitors

Deepa B. Baimare<sup>1</sup>, Priti Mangrulkar<sup>2</sup>, Shreerang Vyawahare<sup>3</sup>, Santoshi Biswal<sup>4</sup>,  
Abhay D. Deshmukh<sup>1\*</sup>

<sup>1</sup>*Department of Physics, Rashtrasant Tukadoji Maharaj Nagpur University, Nagpur,  
Maharashtra, India.*

<sup>2</sup>*Department of Chemistry, School of Humanities and Sciences, Ramdeobaba University,  
Nagpur, Maharashtra, India.*

<sup>3,4</sup>*Ramdeobaba University, Nagpur, Maharashtra, India.*

\*Corresponding author: Abhay D. Deshmukh, [abhay.d07@gmail.com](mailto:abhay.d07@gmail.com)

| <b>Table/Figure</b>    | <b>Page No.</b> |
|------------------------|-----------------|
| Supplementary Fig S1   | 2               |
| Supplementary Fig S2   | 3               |
| Supplementary Fig S3   | 4               |
| Supplementary Fig S4   | 5               |
| Supplementary Fig S5   | 6               |
| Supplementary Table T1 | 7               |
| Supplementary Table T2 | 8               |

**Supplementary Fig 1:**

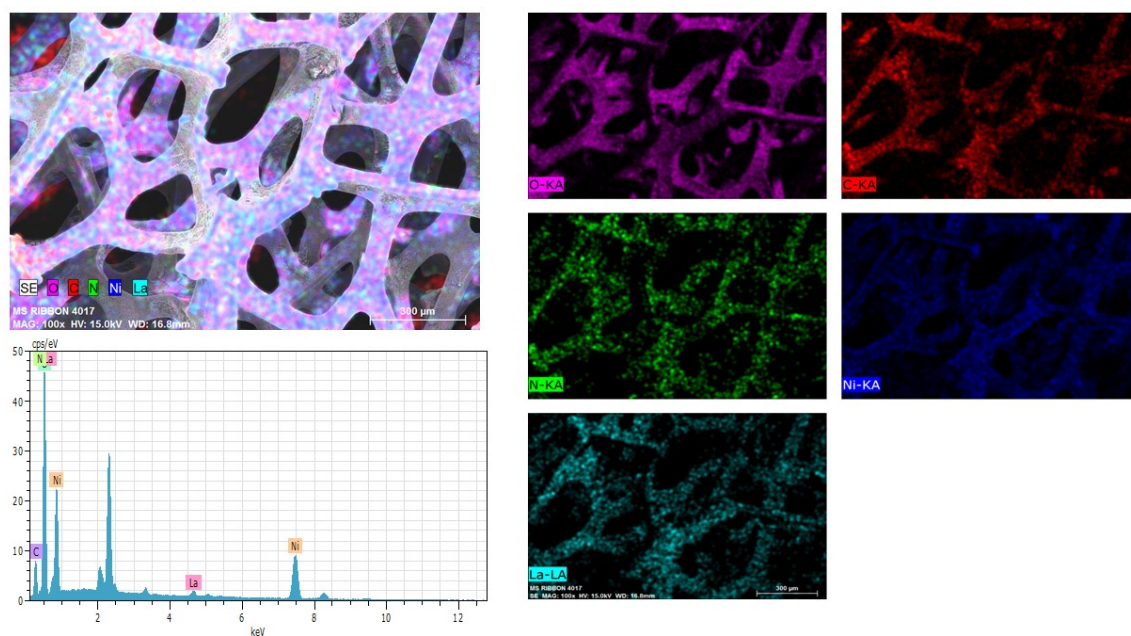

**Fig S1: EDX analysis of the prepared NL-MOF/PANI material.**

## Supplementary Fig S2

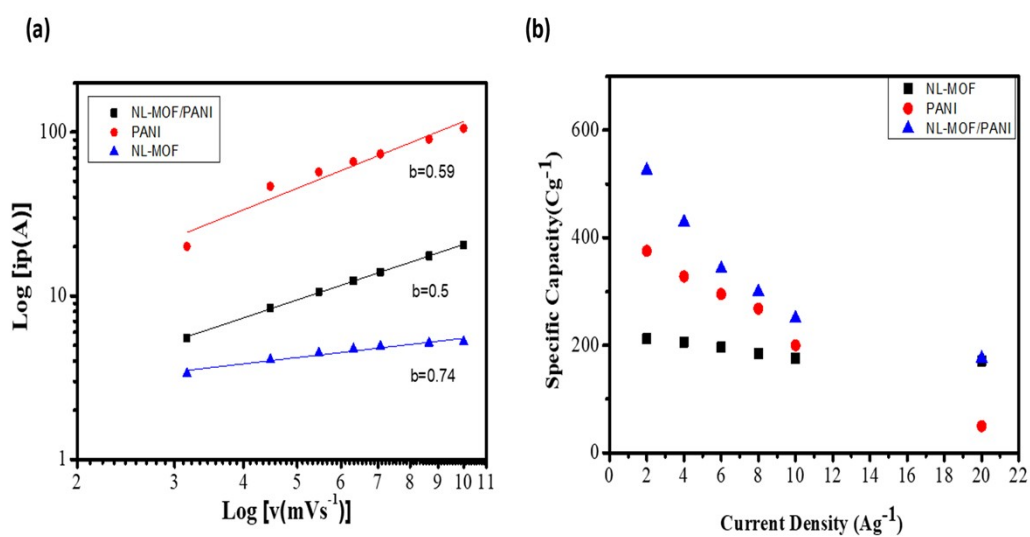

Supplementary Fig S2: (a) Comparative power law analysis of PANI, NL-MOF and NL-MOF/PANI electrodes, (b) Comparative specific capacity vs current density plot of NL-MOF PANI, PANI and NL-MOF

**Supplementary Fig S3**

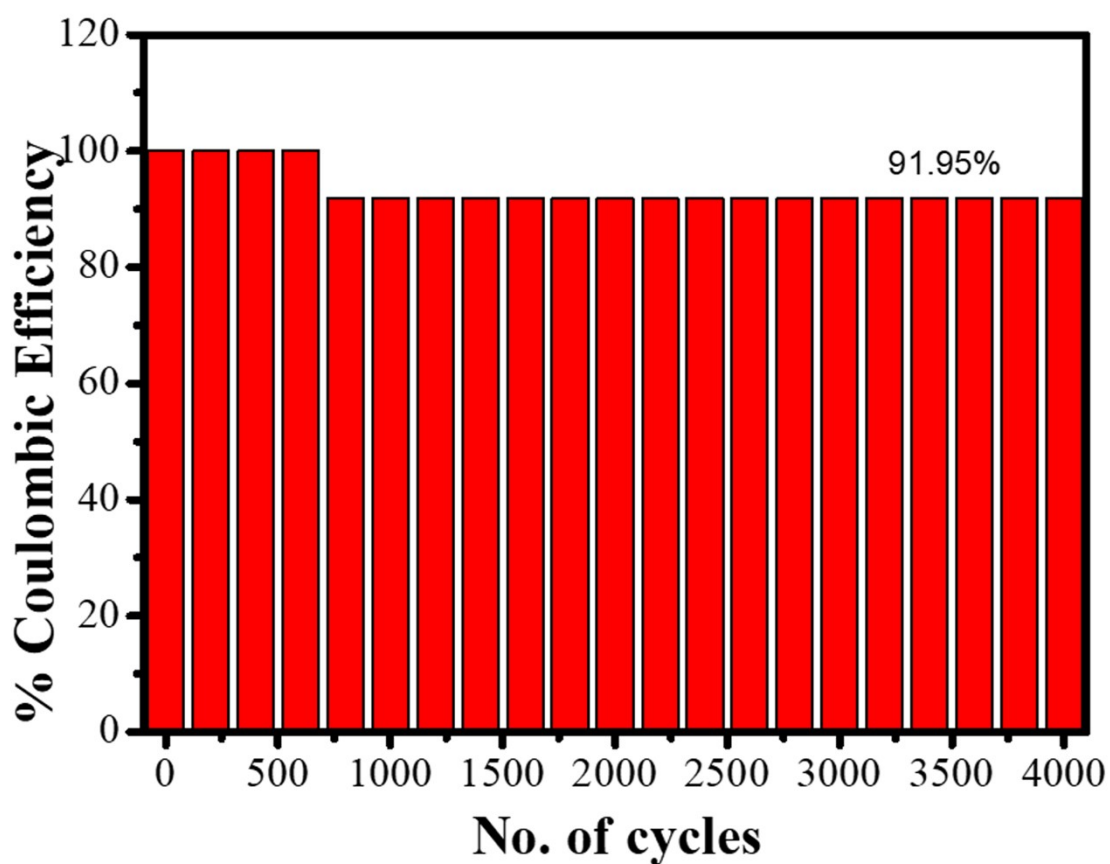

**Supplementary Fig S3: %Coulombic efficiency plot of NL-MOF/PANI electrode in 1M KOH electrolyte.**

**Supplementary Fig S4**

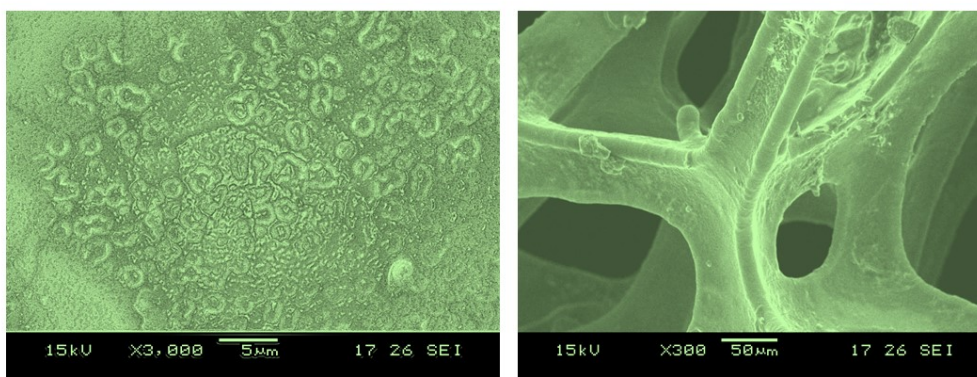

**Supplementary Fig S4: After cycle SEM image of NL-MOF/PANI.**

**Supplementary Fig S5:**

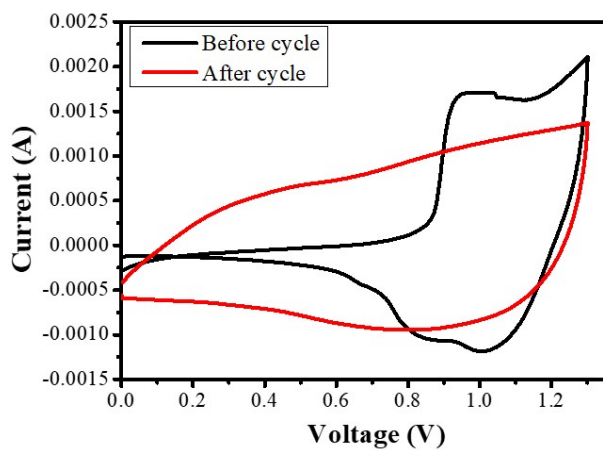

**Supplementary Fig S5: Before and after cycle NL-MOF/PANI/ACC device.**

### Supplementary Table T1

| Current densities | Specific Capacity of NL-MOF (Cg-1) | Specific Capacity of PANI (Cg-1) | Specific Capacity of NL-MOF/PANI (Cg-1) |
|-------------------|------------------------------------|----------------------------------|-----------------------------------------|
| 2                 | 211.96                             | 375.43                           | 525.68                                  |
| 4                 | 206.15                             | 327.75                           | 428.95                                  |
| 6                 | 196.47                             | 295.22                           | 342.47                                  |
| 8                 | 184.5                              | 268.15                           | 299.48                                  |
| 10                | 175.92                             | 200.20                           | 250.39                                  |
| 20                | 171.10                             | 49.60                            | 175.800                                 |
|                   |                                    |                                  |                                         |

Supplementary Table T1: Comparative electrochemical performance of NL-MOF/ PANI, NL-MOF/PANI

Supplementary Table T2:

| Current Density<br>Ag-1 | Specific Capacity<br>(Cg-1) | Specific Capacitance<br>(Fg-1) | Energy Density<br>(Whkg <sup>-1</sup> ) | Power Density<br>(Wkg <sup>-1</sup> ) |
|-------------------------|-----------------------------|--------------------------------|-----------------------------------------|---------------------------------------|
| 0.5                     | 401.44                      | 308.8                          | 72.48                                   | 1299.999                              |
| 0.75                    | 337.79                      | 259.84                         | 60.99                                   | 1949.94                               |
| 1                       | 250.406                     | 192.62                         | 45.21                                   | 2599.89                               |
| 2                       | 139.51                      | 107.32                         | 25.19                                   | 5199.85                               |
| 3                       | 111.83                      | 86.03                          | 20.19                                   | 7799.93                               |
| 5                       | 76.557                      | 58.89                          | 13.82                                   | 13095.27                              |

Supplementary Table T2: Electrochemical performances of NL-MOF/PANI/ACC in 1M KOH electrolyte
